# Supplementary material for: Geologic occurrences of erionite in the United States: an emerging national public health concern for respiratory disease
Source: Springer Nature journal article supplement (doi:10.1007/s10653-012-9504-9), 2013-01-11
Supplement: MOESM1 [file 10653_2012_9504_MOESM1_ESM.xls]

## Sheet: References cited
Reference	Full citation
Bargar (1990)	Bargar, K.E., 1990, Hydrothermal alteration in geothermal drill hole CTGH-1, High Cascade Range, Oregon: Oregon Geology, v. 52, no. 4, p. 75–81.
Bargar and Beeson (1981)	Bargar, K.E., and Beeson, M.H., 1981, Hydrothermal alteration in research drill hole Y-2, Lower Geyser Basin, Yellowstone National Park, Wyoming: American Mineralogist, v. 66, nos. 5 and 6, p. 473–490.
Bargar and Keith (1984)	Bargar, K.E., and Keith, T.E.C., 1984, Hydrothermal alteration mineralogy in Newberry 2 drill core, Newberry Volcano, Oregon: U.S. Geological Survey Open-File Report 84–92, 62 p.
Bargar and Keith (1995)	Bargar, K.E., and Keith, T.E.C., 1995, Calcium zeolites in rhyolitic drill cores from Yellowstone National Park, Wyoming, in Ming, D.W., and Mumpton, F.A., eds., Natural zeolites '93—Occurrence, properties, use: Brockport, N.Y., International Committee on Natural Zeolites, p. 69–86.
Bargar et al. (1981)	Bargar, K.E., Beeson, M.H., and Keith, T.E.C., 1981, Zeolites in Yellowstone National Park: Mineralogical Record, v. 12, no. 1, p. 29–38.
Barnosky et al. (1988)	Barnosky, A.D., Labar, W.J., and Barnosky, C.W., 1988, Paleoenvironmental implications of Barstovian lake deposits, mammal fossils, and pollen from Hepburn's Mesa in the Yellowstone Valley, Park Co., S.W. Montana: Geological Society of America Abstracts with Programs, v. 20, no. 6, p. 405.
Barrows (1980)	Barrows, K.J., 1980, Zeolitization of Miocene volcaniclastic rocks, southern Desatoya Mountains, Nevada: Geological Society of America Bulletin, v. 91, no. 4, p. 199–210.
Bay (1969)	Bay, K.W., 1969, Stratigraphy of Eocene sedimentary rocks in the Lysite Mountain area, Hot Springs, Fremont, and Washakie Counties, Wyoming: Laramie, Wyo., University of Wyoming, Ph.D. dissertation, 181 p.
Benson and Teague (1982)	Benson, L.V., and Teague, L.S., 1982, Diagenesis of basalts from the Paco Basin, Washington—I. Distribution and composition of secondary mineral phases: Journal of Sedimentary Petrology, v. 52, no. 2, p. 595–613.
Bish and Chipera (1991)	Bish, D.L., and Chipera, S.J., 1991, Detection of trace amounts of erionite using X-ray powder diffraction—Erionite in tuffs of Yucca Mountain, Nevada, and central Turkey: Clays and Clay Minerals, v. 39, no. 4, p. 437–445.
Bodine et al. (1987)	Bodine, M.W., Jr., Hay, R.L., Madsen, B.M., and Altaner, S.P., 1987, Lacustrine volcaniclastic sediments in the Creede Formation, San Juan Mountains, Colorado: Geological Society of America Abstracts with Programs, v. 19, no. 5, p. 261–262.
Boles and Surdam (1979)	Boles, J.R., and Surdam, R.C., 1979, Diagenesis of volcanogenic sediments in a Tertiary saline lake—Wagon Bed Formation, Wyoming: American Journal of Science, v. 279, no. 7, p. 832–853.
Bowie et al. (1987)	Bowie, M.R., Barker, J.M., and Peterson, S.L., 1987, Comparison of selected zeolite deposits of Arizona, New Mexico, and Texas, in Peirce, H.W., ed., Proceedings of the 21st Forum on the Geology of Industrial Minerals: Arizona Bureau of Geology and Mineral Technology Special Paper 4, p. 90–105.
Campion (1979)	Campion, K.M., 1979, Diagenetic alteration and formation of authigenic minerals in the Miocene "Rome beds", southeast Oregon: Columbus, Ohio, Ohio State University, Ph.D. dissertation, 185 p.
Chipera and Bish (1989)	Chipera, S.J., and Bish, D.L., 1989, The occurrence and distribution of erionite at Yucca Mountain, Nevada: Los Alamos National Laboratory Report LA-11663-MS, 20 p.
Coffman (1983)	Coffman, R.L., 1983, Mineralogy and geochemistry of zeolitized tuffs from the Barstow Formation in the Mud Hills, San Bernardino County, California: Riverside, Calif., University of California, M.S. thesis, 102 p.
Deffeyes (1959)	Deffeyes, K.S., 1959, Erionite from Cenozoic tuffaceous sediments, central Nevada: American Mineralogist, v. 44, nos. 5 and 6, p. 501–509.
Eakle (1898)	Eakle, A.S., 1898, Erionite—A new zeolite: American Journal of Science, Fourth Series, v. 6, no. 31, p. 66–68.
Eberly (1964)	Eberly, P.E., Jr., 1964, Adsorption properties of naturally occurring erionite and its cationic-exchanged forms: American Mineralogist, v. 49, nos. 1 and 2, p. 30–40.
Edson (1977)	Edson, G.M., 1977, Some bedded zeolites, Sam Simon basin, southeastern Arizona: Tucson, Ariz., University of Arizona, M.S. thesis, 65 p.
Eyde (1978)	Eyde, T.H., 1978, Bowie zeolite—An Arizona industrial mineral: Arizona Bureau of Geology and Mineral Technology Fieldnotes, v. 8, no. 4, p. 1–5.
Eyde (1982)	Eyde, T.H., 1982, Zeolite deposits in the Gila and San Simon valleys of Arizona and New Mexico, in Industrial rocks and minerals of the Southwest: New Mexico Bureau of Mines and Mineral Resources Circular 182, p. 65–71.
Eyde and Irvin (1979)	Eyde, T.H., and Irvin, G.W., 1979, Arizona zeolites: Arizona Department of Mineral Resources Mineral Report No. 1, 40 p.
Ferns (1992)	Ferns, M.L., 1992, Preliminary geologic map of Wrangle Butte quadrangle, Malheur County, Oregon: Oregon Department of Geology and Mineral Industries Open-File Report O–92–15.
Ferns et al. (1993)	Ferns, M.L., Evans, J.G., and Cummings, M.L., 1993, Geologic map of the Mahogany Mountain 30 x 60 minute quadrangle, Malheur County, Oregon, and Owyhee County, Idaho: Oregon Department of Geology and Mineral Industries Geological Map Series GMS–78.
Finnell (1987)	Finnell, T.L., 1987, Geologic map of the Cliff quadrangle, Grant County, New Mexico: U.S. Geological Survey Miscellaneous Investigations Series Map I–1768, scale 1:50,000.
Forsman (1986)	Forsman, Nels, 1986, Documentation and diagenesis of tuffs in the Killdeer Mountains, Dunn County, North Dakota: North Dakota Geological Survey Report of Investigation No. 87, 13 p.
Glanzman et al. (1978)	Glanzman, R.K., Rytuba, J.J., and McCarthy, J.H., Jr., 1978, Lithium in the McDermitt caldera, Nevada and Oregon: Energy, v. 3, no. 3, p. 347–353.
Gude (1985)	Gude, A.J., 3rd, 1985, Zeolite deposits in the Barstow Formation, Mud Hills, San Bernardino County, California, in Clays and zeolites—Los Angeles, California, to Las Vegas, Nevada: 1985 International Clay Conference Field Trip Guidebook, p. 7–27.
Gude and Sheppard (1981)	Gude, A.J., 3rd, and Sheppard, R.A., 1981, Woolly erionite from the Reese River zeolite deposit, Lander County, Nevada, and its relationship to other erionites: Clays and Clay Minerals, v. 29, no. 5, p. 378–384.
Gude and Sheppard (1986)	Gude, A.J., 3rd, and Sheppard, R.A., 1986, Zeolitic diagenesis of tuffs in an upper Miocene lacustrine deposit near Durkee, Baker County, Oregon, in Mumpton, F.A., ed., Studies in diagenesis: U.S. Geological Survey Bulletin 1578, p. 301–333.
Gude and Sheppard (1988)	Gude, A.J., 3rd, and Sheppard, R.A., 1988, A zeolitic tuff in a lacustrine facies of the Gila Conglomerate near Buckhorn, Grant County, New Mexico: U.S. Geological Survey Bulletin 1763, 22 p.
Gude and Sheppard (1993)	Gude, A.J., 3rd, and Sheppard, R.A., 1993, Geology and mineralogy of the Durkee zeolite deposit, Durkee, Oregon, in Mumpton, F.A., ed., Zeo-Trip '93—An excursion to selected zeolite and clay deposits in southeastern Oregon and southwestern Idaho, June 26–28, 1993: Brockport, N.Y., International Committee on Natural Zeolites, p. 30–41.
Harris and King (1990)	Harris, R.E., and King, J.K., 1990, Natural zeolites in Wyoming: Wyoming Geological Survey Open-File Report 90–4, 51 p.
Hay (1964)	Hay, R.L., 1964, Phillipsite of saline lakes and soils: American Mineralogist, v. 49, p. 1366–1387.
Hay (1966)	Hay, R.L., 1966, Zeolites and zeolitic reactions in sedimentary rocks: Geological Society of America Special Paper 85, 130 p.
Holmes (1990)	Holmes, D.A., 1990, Pacific Northwest zeolite update, in Geitgey, R.P., and Vogt, B.F., eds., Industrial rocks and minerals of the Pacific Northwest: Oregon Department of Geology and Mineral Industries Special Paper 23, p. 79–88.
Holmes (1994)	Holmes, D.A., 1994, Zeolites, in Carr, D.D., ed., Industrial minerals and rocks (6th ed.): Littleton, Colo., Society for Mining, Metallurgy, and Exploration, p. 1129–1158.
Honda and Muffler (1970)	Honda, S., and Muffler, L.J.P., 1970, Hydrothermal alteration in core from research drill hole Y-1, Upper Geyser Basin, Yellowstone National Park, Wyoming: American Mineralogist, v. 55, nos. 9 and 10, p. 1714–1737.
Honda and Sasaki (1977)	Honda, S., and Sasaki, K., 1977, Scanning electron micrographs of zeolites produced by hydrothermal alteration—An example in core from research drill hole Y-1, Yellowstone National Park, U.S.A.: Ahido University Mineralogy Publication 44, p. 1–16.
Kamb and Oke (1960)	Kamb, W.B., and Oke, W.C., 1960, Paulingite—A new zeolite, in association with erionite and filiform pyrite: American Mineralogist, v. 45, nos. 1 and 2, p. 79–91.
Keith and Muffler (1978)	Keith, T.E.C., and Muffler, L.J.P., 1978, Minerals produced during cooling and hydrothermal alteration of ash flow tuff from Yellowstone drill hole Y-5: Journal of Volcanology and Geothermal Research, v. 3, nos. 3 and 4, p. 373–402.
Keith et al. (1978)	Keith, T.E.C., White, D.E., and Beeson, M.H., 1978, Hydrothermal alteration and self-sealing in Y-7 and Y-8 drill holes in northern part of Upper Geyer Basin, Yellowstone National Park, Wyoming: U.S. Geological Survey Professional Paper 1054–A, 26 p.
Kistner (1984)	Kistner, D.J., 1984, Fracture of a volcanic lithocap, Red Mountain porphyry copper prospect, Santa Cruz County, Arizona: Tucson, Ariz., University of Arizona, M.S. thesis, 75 p.
Krieger (1979)	Krieger, M.H., 1979, Zeolitization of Tertiary tuffs in lacustrine and alluvial deposits in the Ray-San Manuel area, Pinal and Gila Counties, Arizona: U.S. Geological Survey Professional Paper 1124–D, p. D1–D11.
Larsen and Crossey (1994)	Larsen, Daniel, and Crossey, L.J., 1994, Analysis of sedimentation, hydrology, and diagenesis within an ancient caldera-lake basin—The Oligocene Creede Formation, Colorado, U.S.A.: Geological Society of America Abstracts with Programs, v. 26, no. 7, p. A–400.
Larsen and Crossey (2000)	Larsen, Daniel, and Crossey, L.J., 2000, Sedimentary petrology and authigenic mineral distributions in the Oligocene Creede Formation, Colorado, United States, in Bethke, P.M., and Hay, R.L., eds., Ancient Lake Creede—Its volcano-tectonic setting, history of sedimentation, and relation to mineralization in the Creede Mining District: Geological Society of America Special Paper 346, p. 179-208.
Lowers et al. (2010)	Lowers, H.A., Adams, D.T., Meeker, G.P., and Nutt, C.J., 2010, Chemical and morphological comparison of erionite from Oregon, North Dakota, and Turkey: U.S. Geological Survey Open-File Report 2010–1286, 13 p. Available at http://pubs.usgs.gov/of/2010/1286/.
Madsen (1970)	Madsen, B.M., 1970, Core logs of three test holes in Cenozoic lake deposits near Hector, California: U.S. Geological Survey Bulletin 1296, 43 p.
Mariner (1971)	Mariner, R.H., 1971, Experimental evaluation of authigenic mineral reactions in the Pliocene Moonstone Formation: Laramie, Wyo., University of Wyoming, Ph.D. dissertation, 133 p.
McLemore (2008)	McLemore, V.T., 2008, Buckhorn zeolite deposit, in Mack, Greg, Witcher, James, and Lueth, V.W., eds., Geology of Gila Wilderness-Silver City area: New Mexico Geological Society Fall Field Conference Guidebook, v. 59, p. 10–11.
Mumpton and Ormsby (1976)	Mumpton, F.A., and Ormsby, W.C., 1976, Morphology of zeolites in sedimentary rocks by scanning electron microscopy: Clays and Clay Minerals, v. 24, no. 1, p. 1–23.
Olander (1979)	Olander, P.A., Jr., 1979, Authigenic mineral reactions in tuffaceous sedimentary rocks, Buckhorn, New Mexico: Laramie, Wyo., University of Wyoming, M.S. thesis, 82 p.
Papke (1972)	Papke, K.G., 1972, Erionite and other associated zeolites in Nevada: Nevada Bureau of Mines and Geology Bulletin 79, 32 p.
Park (1995)	Park, L.E., 1995, Geochemical and paleoenvironmental analysis of lacustrine arthropod-bearing concretions of the Barstow Formation, southern California: Palaios, v. 10, no. 1, p. 44–57.
Raymond (1986)	Raymond, W.H., 1986, Clinoptilolite deposit in the Pine Ridge Indian Reservation, South Dakota, U.S.A., in Murakami, Y., Iijima, A., and Ward, J.W., eds., New developments in zeolite science and technology: Tokyo, Kodansha Ltd., p. 79–85.
Raymond et al. (1982)	Raymond, W.H., Bush, A.L., and Gude, A.J., 3rd, 1982, Zeolites in the Pine Ridge Indian Reservation, South Dakota: U.S. Geological Survey Open-File Report 82–959, 14 p.
Reed (1937)	Reed, J.C., 1937, Amygdales in Columbia River lavas near Freedom, Idaho, in Transactions of the American Geophysical Union, 18th annual meeting, April 28—30, 1937, Washington, D.C., Part I: Washington, D.C., National Research Council of the National Academy of Sciences, p. 239–243.
Regnier (1960)	Regnier, Jerome, 1960, Cenozoic geology in the vicinity of Carlin, Nevada: Geological Society of America Bulletin, v. 71, no. 8, p. 1189–1210.
Roehler (1985)	Roehler, H.W., 1985, Geologic map of the Kinney Rim 30 x 60 minute quadrangle, Wyoming and Colorado: U.S. Geological Survey Miscellaneous Investigations Series Map I–1615.
Rytuba (1976)	Rytuba, J.J., 1976, Geology and ore deposits of the McDermitt caldera, Nevada-Oregon: U.S. Geological Survey Open-File Report 76–535, 9 p.
Schenk and Pollastro (1987)	Schenk, C.J., and Pollastro, R.M., 1987, Preliminary geologic analysis of the tar sands near Sunnyside, Utah, in Meyer, R.F., ed., Exploration for heavy crude oil and natural bitumin: American Association of Petroleum Geologists Studies in Geology 25, p. 589–599.
Sedenquist (1986)	Sedenquist, D.F., 1986, Petrography and diagenesis of volcanogenic sediments from the San Augustine Plains, western New Mexico—An example of zeolite authigenesis in a saline, alkaline environment: Boulder, Colo., University of Colorado, M.S. thesis, 117 p.
Shedd et al. (1982)	Shedd, K.B., Virta, R.L., and Wylie, A.G., 1982, Size and shape characterization of fibrous zeolites by electron microscopy: U.S. Bureau of Mines Report of Investigations RI 8674, 20 p.
Sheppard (1976)	Sheppard, R.A., 1976, Zeolites in sedimentary deposits of the northwestern United States—Potential industrial minerals, in Rooney, L.F., and Berg, R.B., eds., Eleventh Industrial Minerals Forum: Montana Bureau of Mines and Geology Special Publication 74, p. 69–84.
Sheppard (1985)	Sheppard, R.A., 1996, Zeolitic diagenesis of tuffs of late Cenozoic Lake Tecopa, Inyo County, California, in Clays and zeolites—Los Angeles, California, to Las Vegas, Nevada: 1985 International Clay Conference Field Trip Guidebook, p. 33–50.
Sheppard (1991)	Sheppard, R.A., 1991, Zeolitic diagenesis of tuffs in the Miocene Chalk Hills Formation, western Snake River Plain, Idaho: U.S. Geological Survey Bulletin 1963, 27 p.
Sheppard (1993)	Sheppard, R.A., 1993, Geology and mineralogy of the Harney Lake zeolite deposit, Harney County, Oregon, in Mumpton, F.A., ed., Zeo-Trip '93—An excursion to selected zeolite and clay deposits in southeastern Oregon and southwestern Idaho, June 26–28, 1993: Brockport, N.Y., International Committee on Natural Zeolites, p. 42–58.
Sheppard (1994)	Sheppard, R.A., 1994, Zeolitic diagenesis of tuffs in Miocene lacustrine rocks near Harney Lake, Harney County, Oregon: U.S. Geological Survey Bulletin 2108, 28 p.
Sheppard (1996)	Sheppard, R.A., 1996, Occurrences of erionite in sedimentary rocks of the western United States: U.S. Geological Survey Open-File Report 96–018, 24 p.
Sheppard and Gude (1964)	Sheppard, R.A., and Gude, A.J., 3rd, 1964, Reconnaissance of zeolite deposits in tuffaceous rocks of the western Mojave Desert and vicinity, California, in Geological Survey research 1964—Chapter C: U.S. Geological Survey Professional Paper 501–C, p. C114–C116.
Sheppard and Gude (1968)	Sheppard, R.A., and Gude, A.J., 3rd, 1968, Distribution and genesis of authigenic silicate minerals in tuffs of Pleistocene Lake Tecopa, Inyo County, California: U.S. Geological Survey Professional Paper 597, 38 p.
Sheppard and Gude (1969a)	Sheppard, R.A., and Gude, A.J., 3rd, 1969a, Chemical composition and physical properties of the related zeolites offretite and erionite: American Mineralogist, v. 54, nos. 5 and 6, p. 875–886.
Sheppard and Gude (1969b)	Sheppard, R.A., and Gude, A.J., 3rd, 1969b, Diagenesis of tuffs in the Barstow Formation, Mud Hills, San Bernardino County, California: U.S. Geological Survey Professional Paper 634, 35 p.
Sheppard and Gude (1969c)	Sheppard, R.A., and Gude, A.J., 3rd, 1969c, Authigenic fluorite in Pliocene lacustrine rocks near Rome, Malheur County, Oregon, in Geological Survey research—1969: U.S. Geological Survey Professional Paper 650–D, p. D69–D74.
Sheppard and Gude (1973)	Sheppard, R.A., and Gude, A.J., 3rd, 1973, Zeolites and associated authigenic silicate minerals in tuffaceous rocks of the Big Sandy Formation, Mohave County, Arizona: U.S. Geological Survey Professional Paper 830, 36 p.
Sheppard and Gude (1980)	Sheppard, R.A., and Gude, A.J., 3rd, 1980, Diagenetic fluorite in the Eastgate zeolite deposit, Churchill County, Nevada: U.S. Geological Survey Open-File Report 80–506, 8 p.
Sheppard and Gude (1983)	Sheppard, R.A., and Gude, A.J., 3rd, 1983, Zeolites in Tertiary tuffs along the Little Humboldt River, Humboldt and Elko Counties, Nevada: U.S. Geological Survey Open-File Report 83–458, 10 p.
Sheppard and Gude (1987)	Sheppard, R.A., and Gude, A.J., 3rd, 1987, Mineralogy and genesis of the Buckhorn zeolite deposit, Grant County, New Mexico, in Mumpton, F.A., ed., Zeo-Trip '87—An excursion to selected zeolite and clay deposits in southwestern New Mexico and eastern Arizona: Brockport, N.Y., International Committee on Natural Zeolites, p. 13–26.
Sheppard and Gude (1993)	Sheppard, R.A., and Gude, A.J., 3rd, 1993, Geology and mineralogy of the Rome zeolite deposit, Rome, Oregon, in Mumpton, F.A., ed., Zeo-Trip '93—An excursion to selected zeolite and clay deposits in southeastern Oregon and southwestern Idaho, June 26–28, 1993: Brockport, N.Y., International Committee on Natural Zeolites, p. 59–73.
Sheppard and Hay (2001)	Sheppard, R.A., and Hay, R.L., 2001, Formation of zeolites in open hydrologic systems, in Bish, D.L., and Ming, D.W., eds., Natural zeolites—Occurrence, properties, applications: Washington, D.C., The Mineralogical Society of America, Reviews in Mineralogy and Geochemistry, v. 45, p. 261–275.
Sheppard et al. (1965)	Sheppard, R.A., Gude, A.J., 3rd, and Munson, E.J., 1965, Chemical composition of diagenetic zeolites from tuffaceous rocks of the Mojave Desert and vicinity, California: American Mineralogist, v. 50, p. 244–249.
Sheppard et al. (1978)	Sheppard, R.A., Gude, A.J., 3rd, and Edson, G.M., 1978, Bowie zeolite deposit, Cochise and Graham Counties, Arizona, in Sand, L.B., and Mumpton, F.A., eds., Natural zeolites—Occurrence, properties, use: Oxford, Pergamon Press, p. 319–328.
Sheppard et al. (1987)	Sheppard, R.A., Eyde, T.H., and Barclay, C.S.V., 1987, Geology, mineralogy, and mining of the Bowie zeolite deposit, Graham and Cochise Counties, Arizona, in Mumpton, F.A., ed., Zeo-Trip '87—An excursion to selected zeolite and clay deposits in southwestern New Mexico and eastern Arizona: Brockport, N.Y., International Committee on Natural Zeolites, p. 27–46.
Staples (1957)	Staples, L.W., 1957, X-ray study of erionite—A fibrous zeolite: Geological Society of America Bulletin, v. 68, no. 12, part 2, p. 1847.
Staples and Gard (1959)	Staples, L.W., and Gard, J.A., 1959, The fibrous zeolite erionite—Its occurrence, unit cell, and structure: Mineralogical Magazine, v. 32, no. 247, p. 261–281.
Stinson (1988)	Stinson, M.C., 1988, Zeolites in California: California Division of Mines and Geology Bulletin 208, 74 p.
Stone (1972)	Stone, W.J., 1972, Middle Cenozoic stratigraphy of North Dakota, in Ting, F.T.C., ed., Depositional environments of the lignite-bearing strata in western North Dakota: North Dakota Geological Survey Miscellaneous Series 50, p. 123–132.
Sweet (1985)	Sweet, W.E., 1985, General geology of the Hector mine, in Clays and zeolites—Los Angeles, California, to Las Vegas, Nevada: 1985 International Clay Conference Field Trip Guidebook, p. 29–32.
Thomssen (1983)	Thomssen, R.W., 1983, The minerals of Malpais Hill, Pinal County, Arizona: The Mineralogical Record, v. 14, no. 2, p. 109–113.
Tschernich (1992)	Tschernich, R.W., 1992, Zeolites of the World: Phoenix, Ariz., Geoscience Press, Inc., 563 p.
Van Houten (1964)	Van Houten, F.B., 1964, Tertiary geology of the Beaver Rim area, Fremont and Natrona Counties, Wyoming: U.S. Geological Survey Bulletin 1164, 99 p.
Walker and Swanson (1968)	Walker, G.W., and Swanson, D.A., 1968, Summary report on the geology and mineral resources of the Harney Lake and Malheur Lake areas of the Malheur National Wildlife Refuge, north-central Harney County, Oregon: U.S. Geological Survey Bulletin 1260–L, p. L1–L17.
Welton (1984)	Welton, J.E., 1984, SEM petrology atlas: American Association of Petroleum Geologists Methods in Exploration Series, 237 p.
Williamson (1987)	Williamson, B.M., 1987, Formation of authigenic silicate minerals in Miocene volcaniclastic rocks, Boron, California: Santa Barbara, Calif., University of California, M.A. thesis, 89 p.
Wise and Tschernich (1976)	Wise, W.S., and Tschernich, R.W., 1976, The chemical compositions and origin of the zeolites offretite, erionite, and levyne: American Mineralogist, v. 61, nos. 9 and 10, p. 853–863.
Wolf and Ellison (1971)	Wolf, K.H., and Ellison, Bruce, 1971, Sedimentary geology of the zeolitic volcanic lacustrine Pliocene Rome beds, Oregon—1: Sedimentary Geology, v. 6, p. 271–302.
Woodburne et al. (1990)	Woodburne, M.O., Tedford, R.H., and Swisher, C.C., III, 1990, Lithostratigraphy, biostratigraphy, and geochronology of the Barstow Formation, Mojave Desert, southern California: Geological Society of America Bulletin, v. 102, no. 4, p. 459–477.
